# Supplementary material
Source: Research Square preprint supplement (doi:10.21203/rs.3.rs-9747240/v1)
Supplement: Supplementary file 1 [file 5f47a8942a4a8c8e1b9db8ad.docx]

# Supplementary Data

| Species | BioProject Accession | SRR number | Group | Treatment |
| --- | --- | --- | --- | --- |
| *Lasiopodomys brandtii* | PRJNA485021 | SRR7662993 | CN1 | 20.9%O2 |
| *Lasiopodomys brandtii* | PRJNA485021 | SRR7662994 | CN2 | 20.9%O2 |
| *Lasiopodomys brandtii* | PRJNA485021 | SRR7663001 | CN3 | 20.9%O2 |
| *Lasiopodomys brandtii* | PRJNA485021 | SRR7663002 | CH1 | 10%O2, 48 h |
| *Lasiopodomys brandtii* | PRJNA485021 | SRR7662991 | CH2 | 10%O2, 48 h |
| *Lasiopodomys brandtii* | PRJNA485021 | SRR7662992 | CH3 | 10%O2, 48 h |
| *Lasiopodomys brandtii* | PRJNA1224482 | SRR32364091 | IN1 | 20.9%O2 |
| *Lasiopodomys brandtii* | PRJNA1224482 | SRR32364100 | IN2 | 20.9%O2 |
| *Lasiopodomys brandtii* | PRJNA1224482 | SRR32364099 | IN3 | 20.9%O2 |
| *Lasiopodomys brandtii* | PRJNA1224482 | SRR32364094 | IH1 | 10%O2, 6 h, 7d |
| *Lasiopodomys brandtii* | PRJNA1224482 | SRR32364093 | IH2 | 10%O2, 6 h, 7d |
| *Lasiopodomys brandtii* | PRJNA1224482 | SRR32364092 | IH3 | 10%O2, 6 h, 7d |

Supplementary Table 1: Transcriptome data of the brain tissue of the Brandt’s vole

| Sample | Clean Reads | Clean Base (G) | GC(%) | G20 (20%) | Q30 (20%) | Mapping Rate (%) |
| --- | --- | --- | --- | --- | --- | --- |
| IH1 | 48923392 | 7.29 | 49.74 | 49.74 | 97.87 | 90.95 |
| IH2 | 43927244 | 6.97 | 50.57 | 50.57 | 98.96 | 90.78 |
| IH3 | 43150160 | 7.34 | 48.10 | 48.10 | 97.82 | 91.02 |
| CH1 | 48923392 | 6.50 | 50.74 | 50.74 | 97.88 | 89.83 |
| CH2 | 43361546 | 6.86 | 47.41 | 47.41 | 97.80 | 89.32 |
| CH3 | 45746278 | 6.95 | 48.75 | 48.75 | 97.75 | 88.04 |
| IN1 | 49436850 | 8.19 | 49.00 | 49.00 | 97.96 | 89.84 |
| IN2 | 42071444 | 9.30 | 50.78 | 50.78 | 97.80 | 91.32 |
| IN3 | 44273892 | 8.11 | 51.46 | 51.46 | 97.12 | 88.40 |
| CN1 | 49959874 | 7.90 | 50.75 | 50.75 | 98.11 | 89.25 |
| CN2 | 47343352 | 7.62 | 50.45 | 50.45 | 97.02 | 88.25 |
| CN3 | 47390372 | 7.24 | 50.62 | 50.62 | 97.99 | 89.92 |

Supplementary Table 2: Clean date quality control results and mapping rate


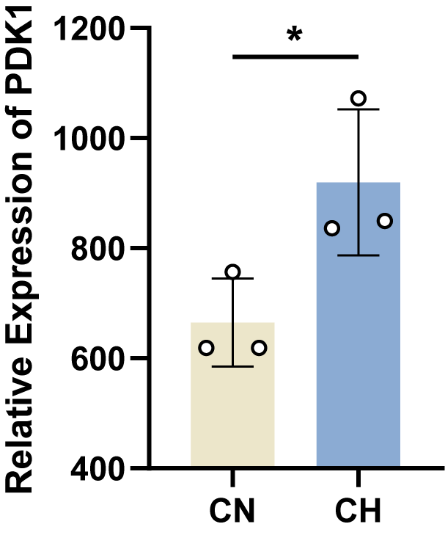


Supplementary Figure 1: *PDK1* expression level in the chronic hypoxia group by transcriptome sequencing
